# Supplementary material for: Total synthesis of 1,4a-di-epi-ent-pancratistatin, exemplifying a stereodivergent approach to pancratistatin isomers
Source: Royal Society of Chemistry journal article supplement (doi:10.1039/d4cc02199a), 2024-01-01
Supplement: d4cc02199a2.pdf [file d4cc02199a2.pdf]

## Supporting Information II

### Total Synthesis of 1,4a-di-*epi-ent*-Pancratistatin, Exemplifying a Stereodivergent Approach to Pancratistatin Isomers

Chunzhao Sun,<sup>a</sup> Tsubasa Inokuma,<sup>a,b</sup> Daisuke Tsuji,<sup>c</sup> Yousuke Yamaoka,<sup>d</sup> Reiko Akagi,<sup>c</sup> and Ken-ichi Yamada<sup>a,b\*</sup>

<sup>a</sup> Graduate School of Pharmaceutical Sciences, Tokushima University, Shomachi, Tokushima 770-8505, Japan

<sup>b</sup> Research Cluster on “Key Material Development”, Tokushima University, Shomachi, Tokushima 770-8505, Japan.

<sup>c</sup> Faculty of Pharmacy, Yasuda Women’s University, Asaminami-ku, Hiroshima 731-0153, Japan

<sup>d</sup> School of Pharmacy, Hyogo Medical University, Chuo-ku, Kobe, Hyogo 650-8530, Japan  
yamak@tokushima-u.ac.jp

## Contents

|                                                                     |    |
|---------------------------------------------------------------------|----|
| Copies of <sup>1</sup> H, <sup>13</sup> C and HMQC NMR spectra..... | S2 |
|---------------------------------------------------------------------|----|

# 1. Copies of $^1\text{H}$ , $^{13}\text{C}$ and HMQC NMR spectra

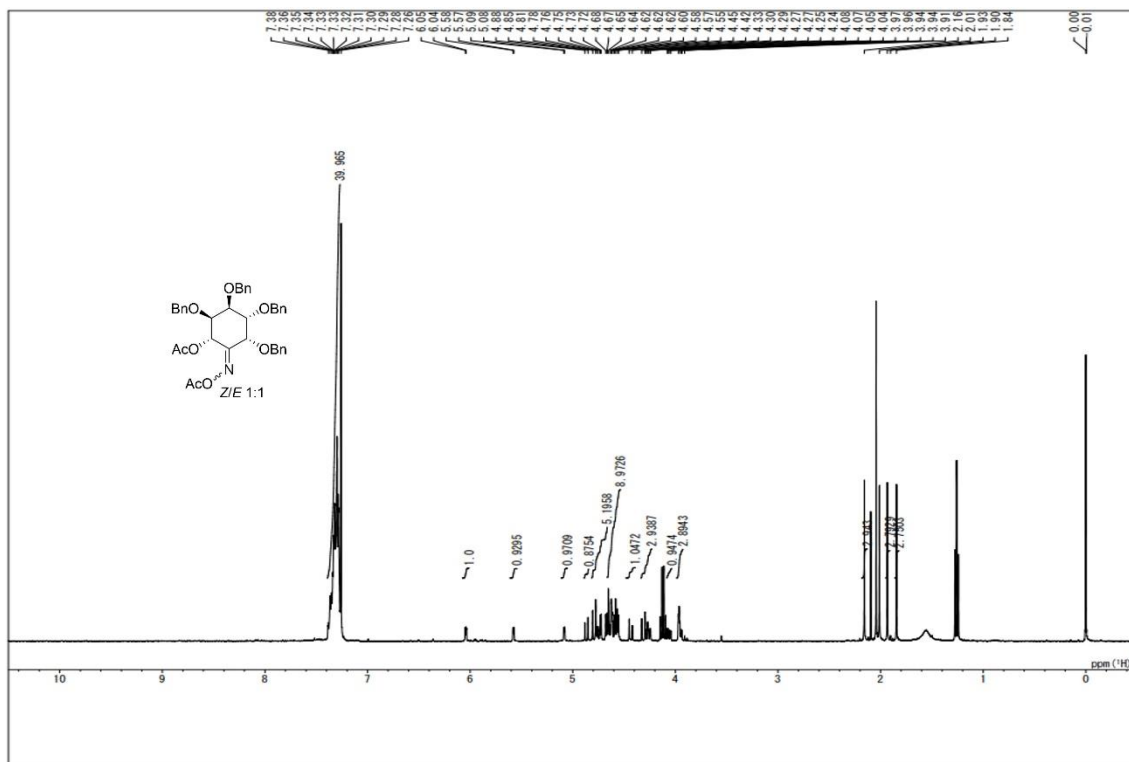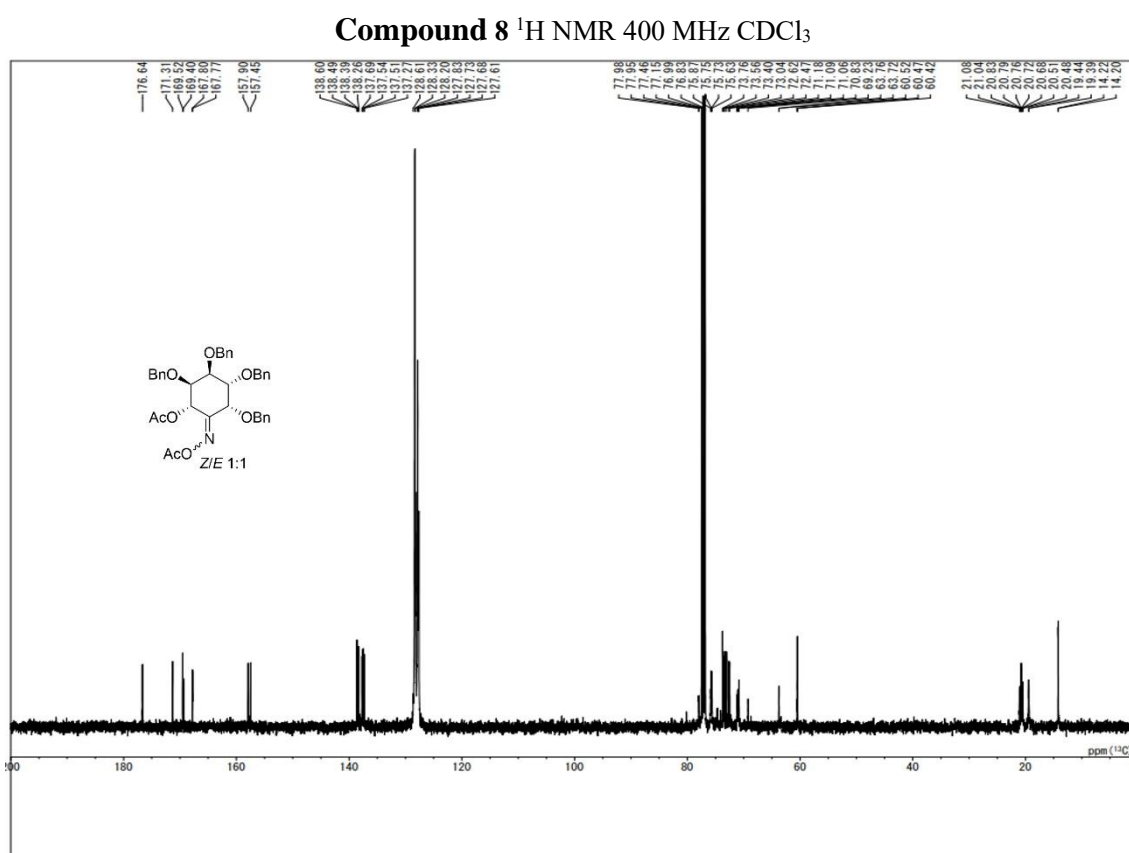

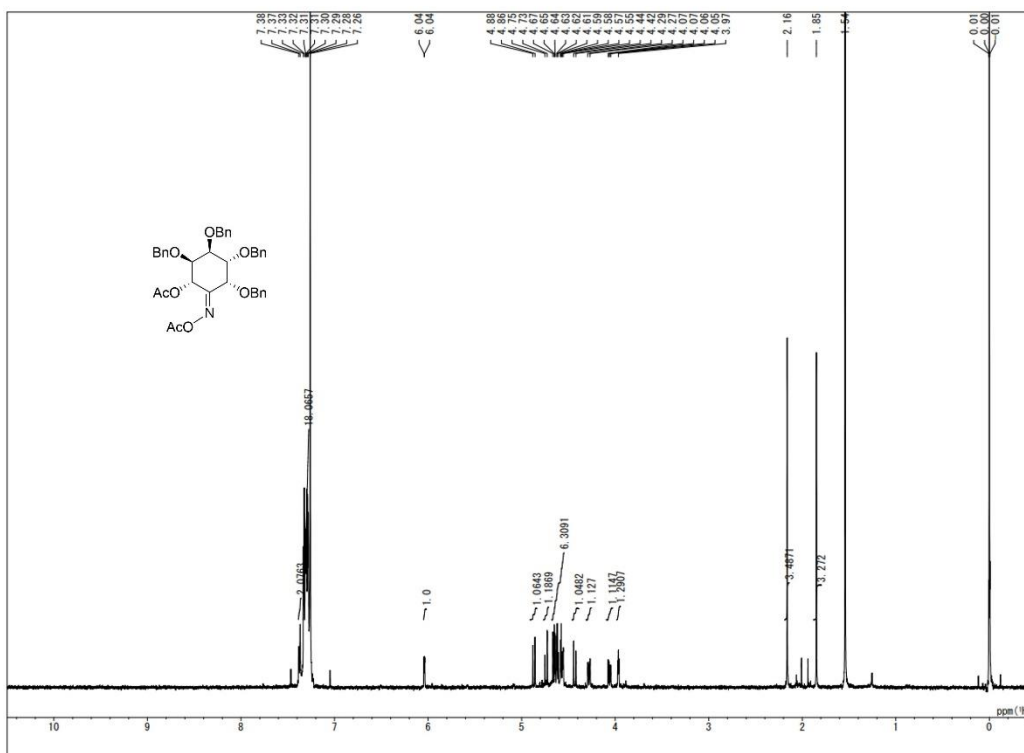

**Compound Z-8** <sup>1</sup>H NMR 500 MHz CDCl<sub>3</sub>

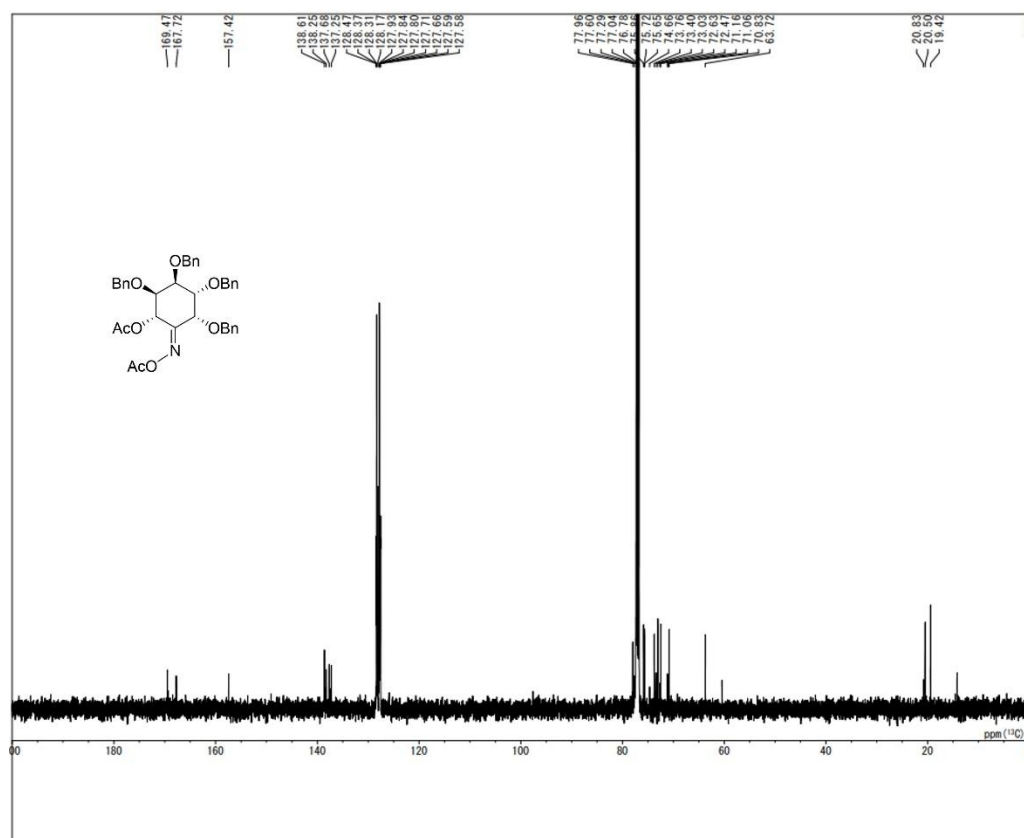

**Compound Z-8** <sup>13</sup>C NMR 125 MHz CDCl<sub>3</sub>

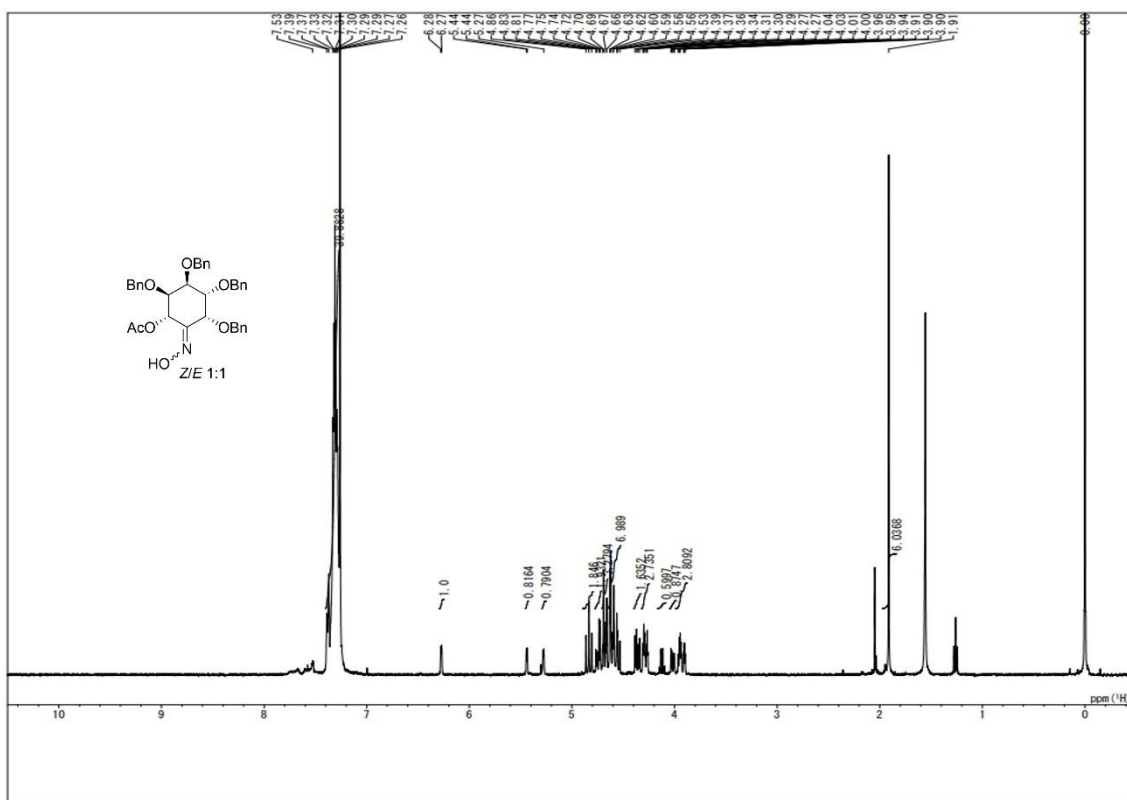

Compound 9 <sup>1</sup>H NMR 400 MHz CDCl<sub>3</sub>

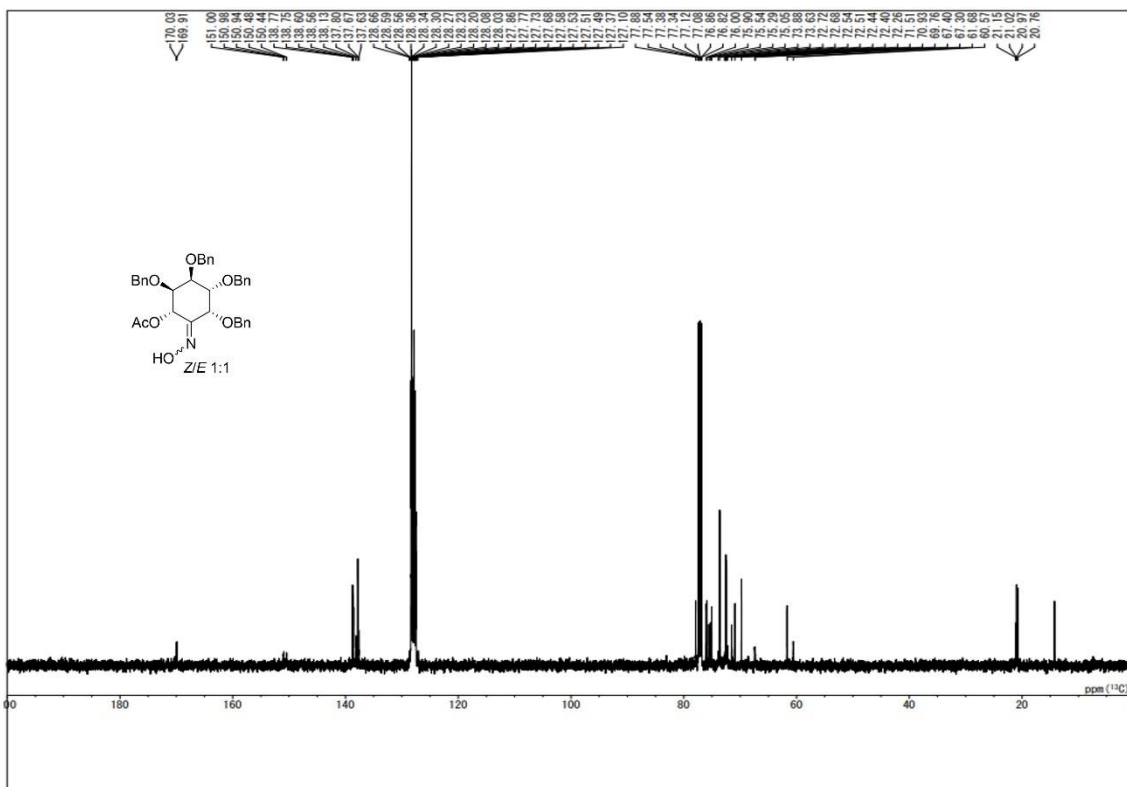

Compound 9 <sup>13</sup>C NMR 125 MHz CDCl<sub>3</sub>





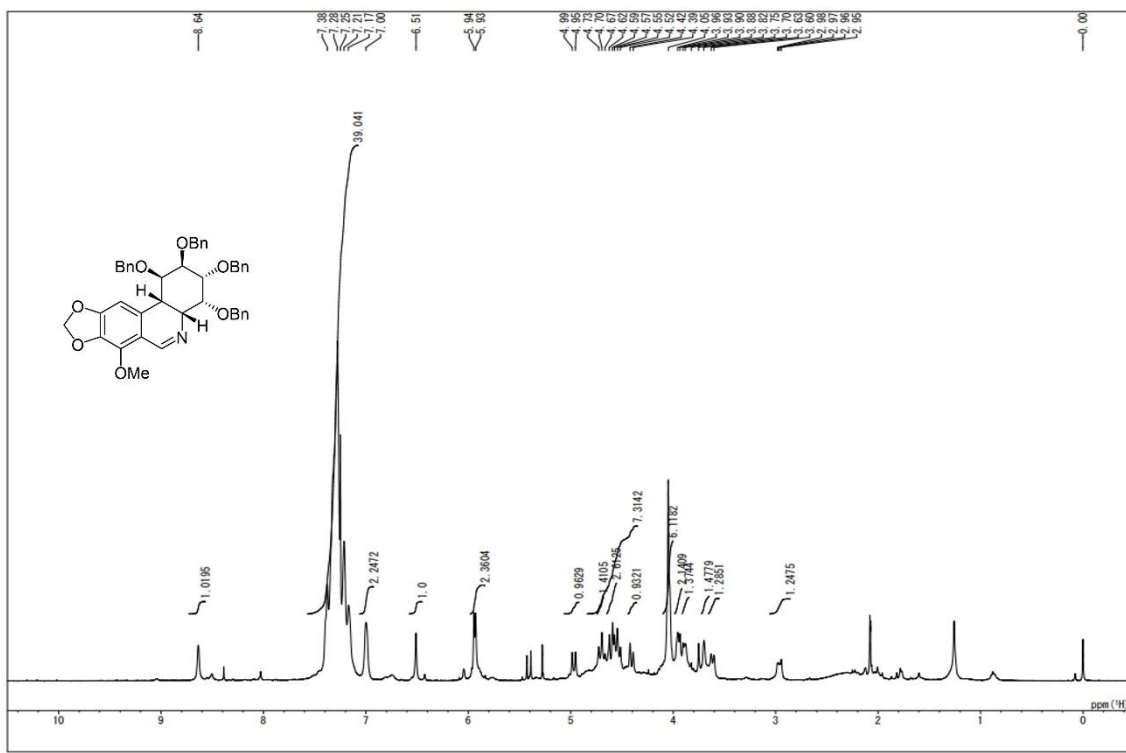

**Compound 13**  $^1\text{H NMR}$  400 MHz  $\text{CDCl}_3$

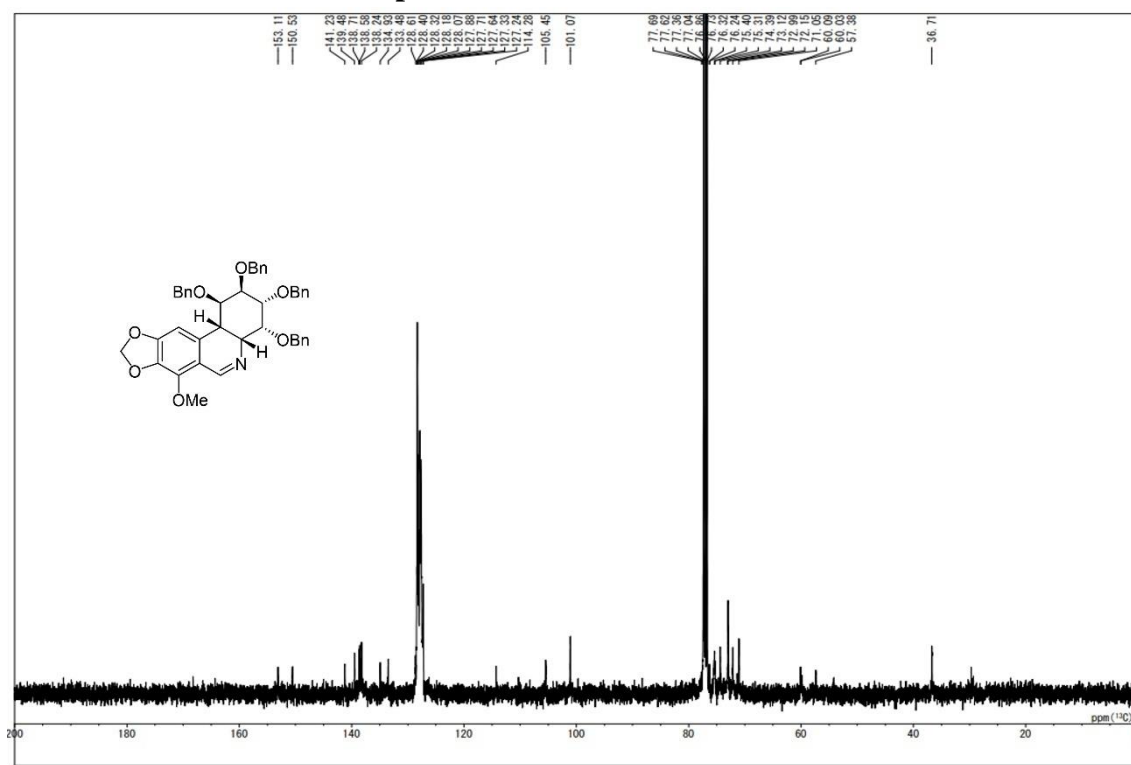

**Compound 13**  $^{13}\text{C NMR}$  100 MHz  $\text{CDCl}_3$

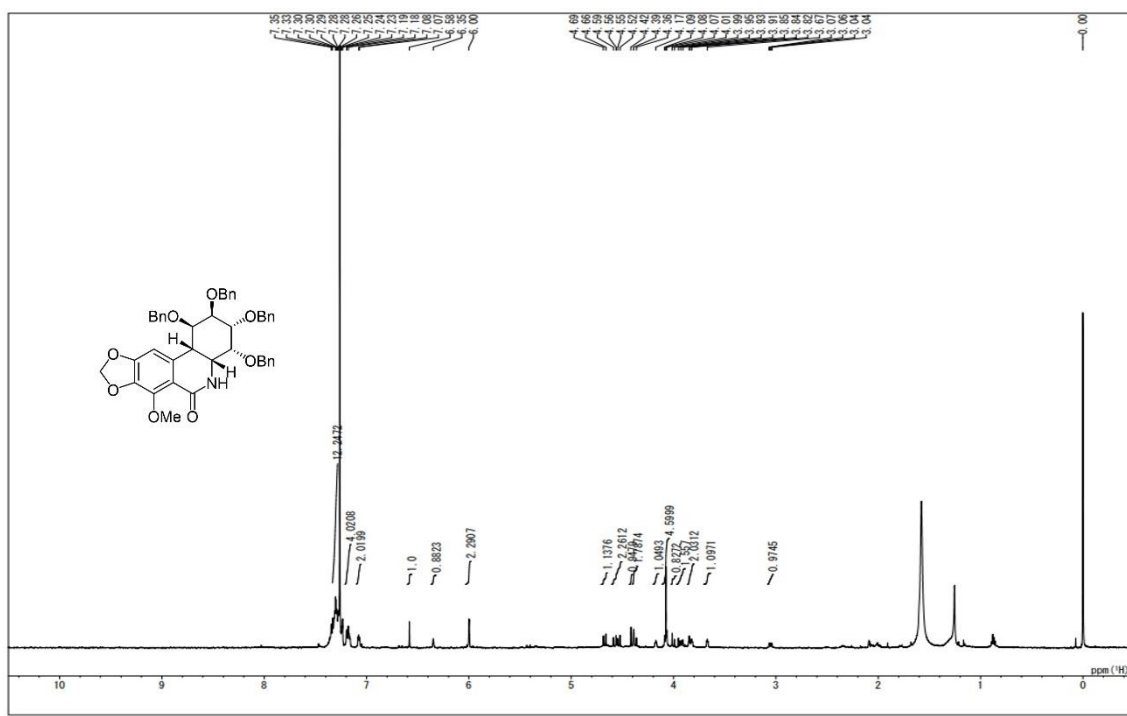

**Compound 14**  $^1\text{H}$  NMR 400 MHz  $\text{CDCl}_3$

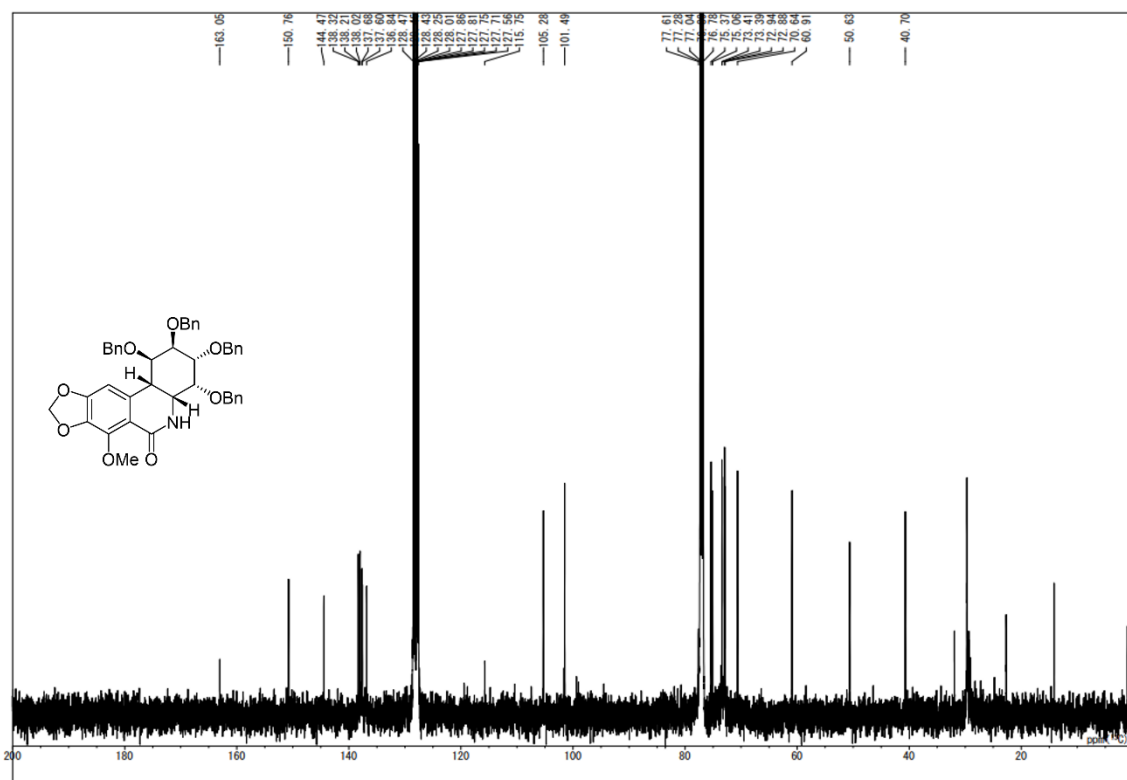

**Compound 14**  $^{13}\text{C}$  NMR 100 MHz  $\text{CDCl}_3$





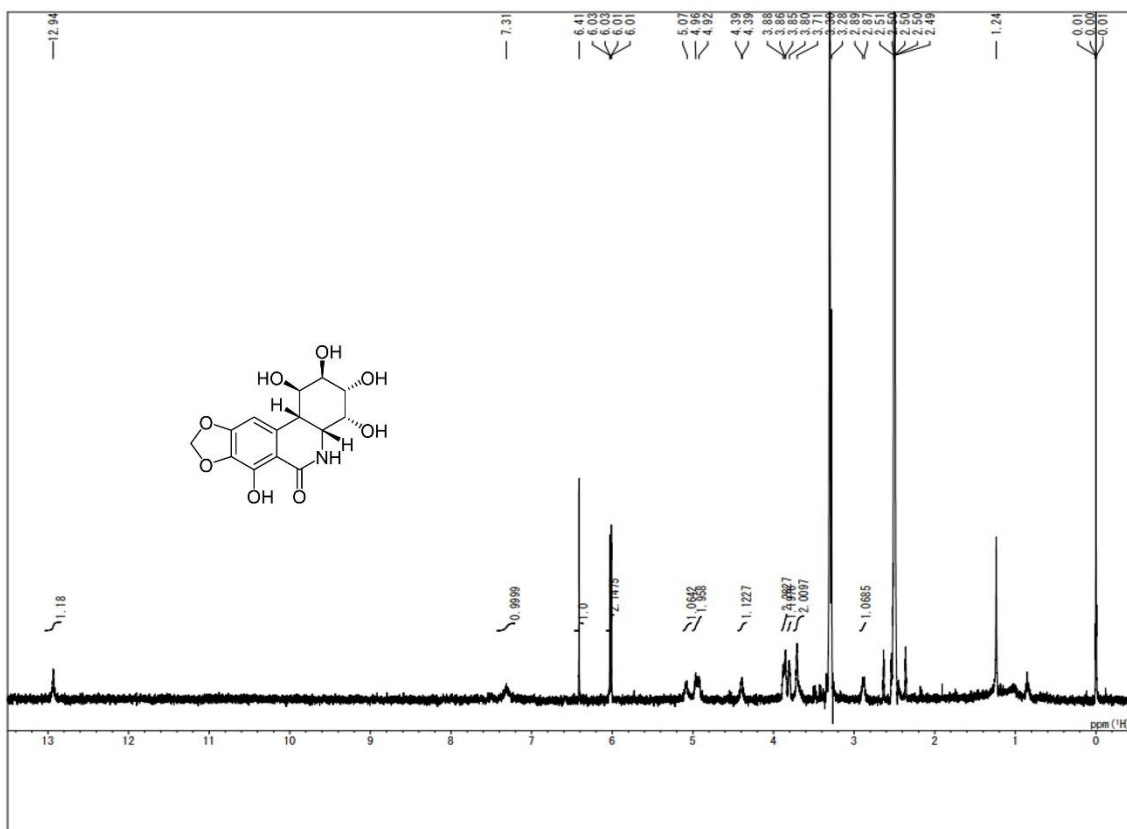

Compound 16 <sup>1</sup>H NMR 500 MHz DMSO-d<sub>6</sub>

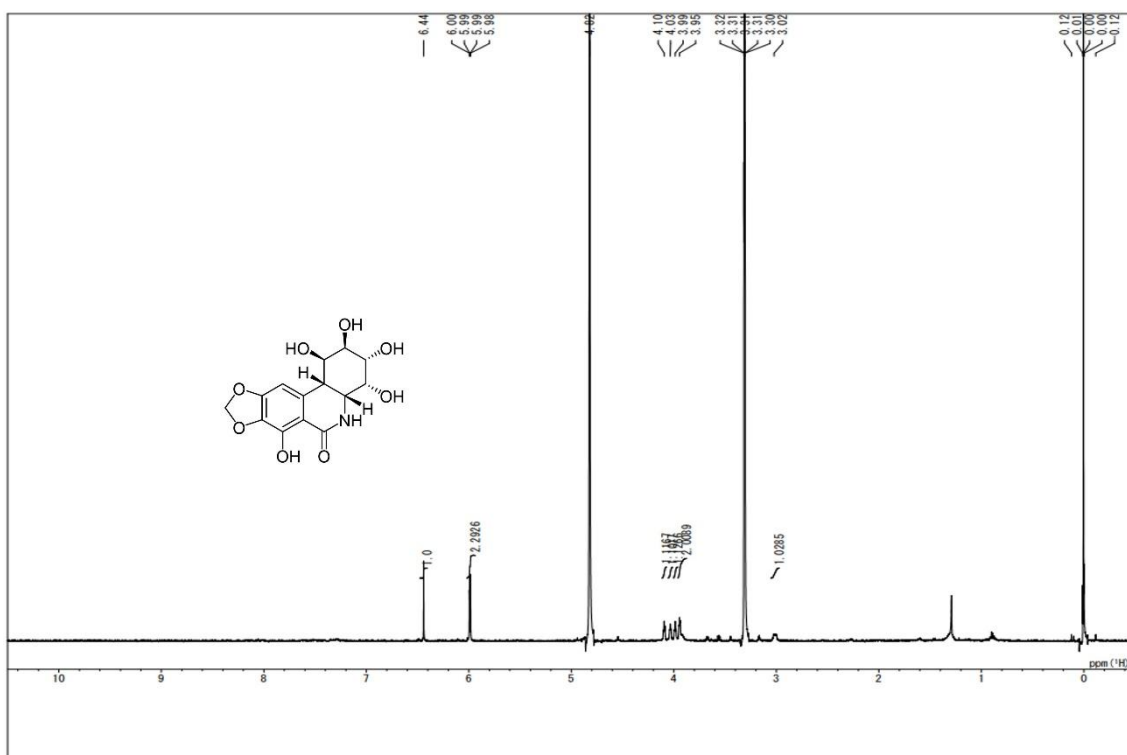

Compound 16 <sup>1</sup>H NMR 400 MHz CD<sub>3</sub>OD

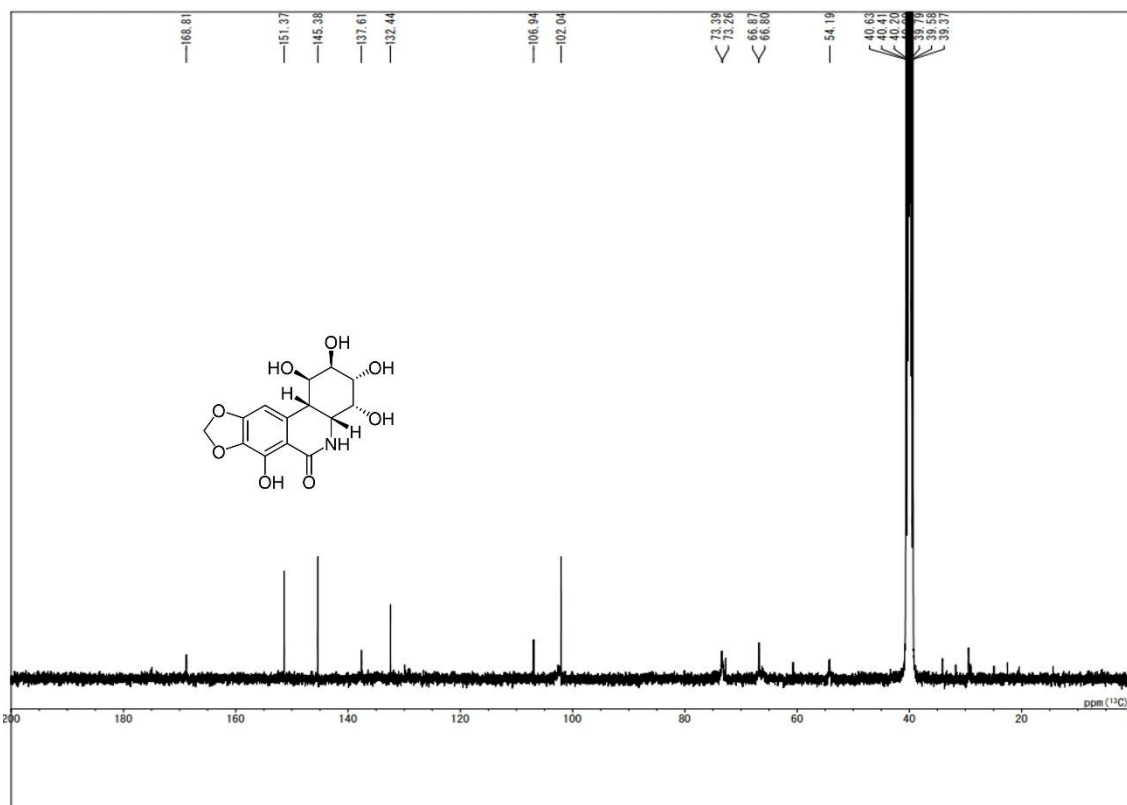

**Compound 16**  $^{13}\text{C}$  NMR 100 MHz DMSO- $\text{d}_6$

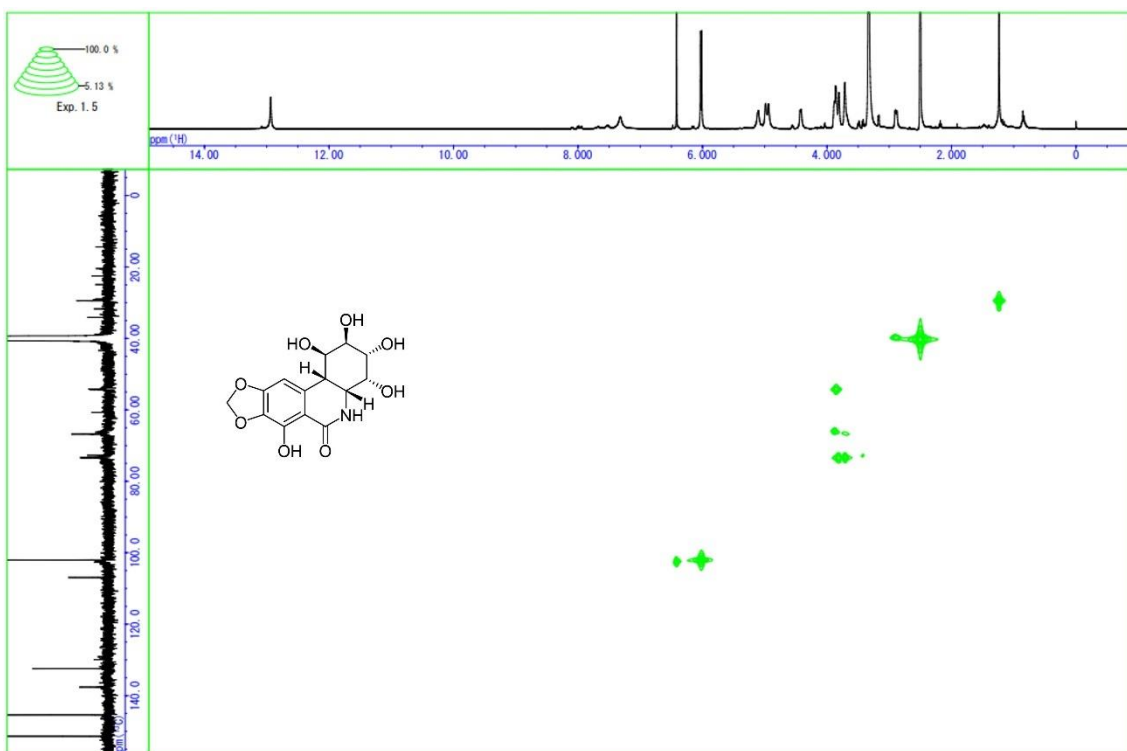

**Compound 16** HMQC 500 MHz DMSO- $\text{d}_6$

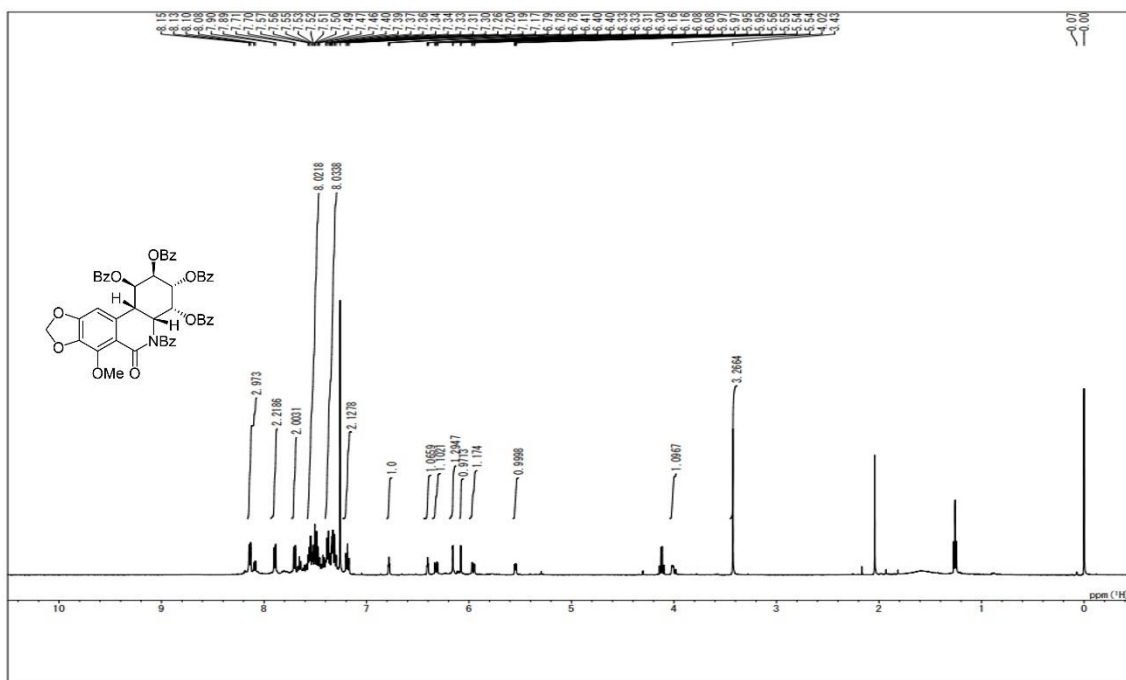

Compound S3  $^1\text{H NMR}$  500 MHz  $\text{CDCl}_3$

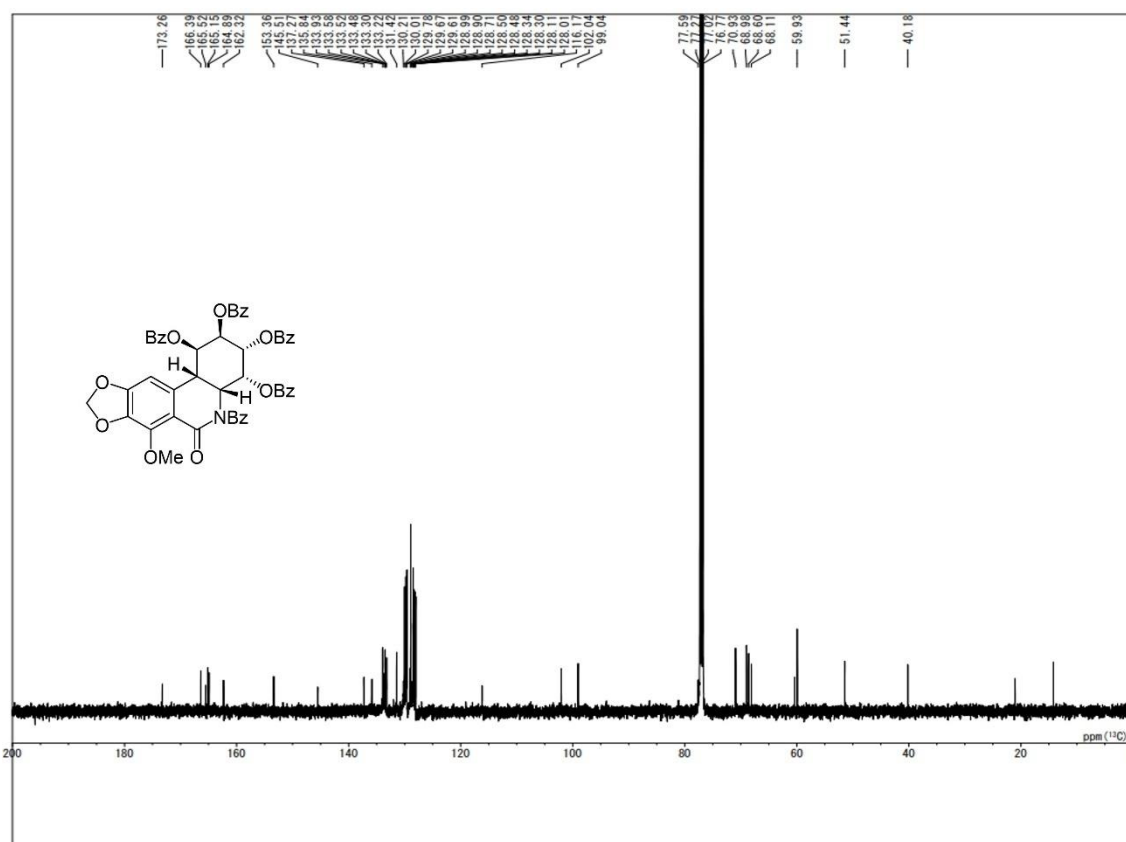

Compound S3  $^{13}\text{C NMR}$  125 MHz  $\text{CDCl}_3$
